# Supplementary material for: Macrophages Upregulate Estrogen Receptor Expression in the Model of Obesity-Associated Breast Carcinoma
Source: MDPI journal article supplement (doi:10.3390/cells11182844), 2022-09-12
Supplement: s1 [file s1]

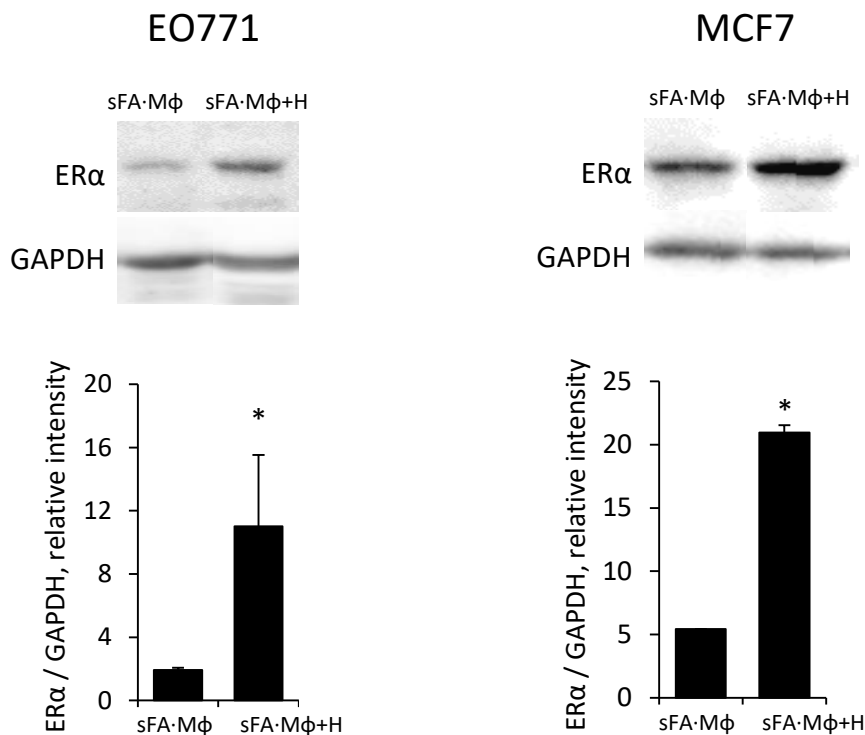

**Supplementary Figure S4. Heparanase augments ability of sFA-stimulated macrophages to upregulate ERα expression in BC cells.** E0771 (left) and MCF7 (right) BC cells were incubated for 16 h with medium conditioned (24 h, 37°C) by primary *wt* macrophages, stimulated by sFA in the absence (sFA·Mφ), or presence of active recombinant heparanase (sFA·Mφ+H). **Top panels:** lysates of E0771 (A) and MCF7 (B) cells were immunoblotted using antibody specific for ERα and GAPDH. **Bottom panels:** The band intensity was quantified using ImageJ software, error bars represent ±SD. \*p<0.02.
