# Supplementary material for: Macrophages Upregulate Estrogen Receptor Expression in the Model of Obesity-Associated Breast Carcinoma
Source: Cells. 2022 Sep 12;11(18):2844. doi: 10.3390/cells11182844 (PMC9496942; doi:10.3390/cells11182844)
Supplement: Supplementary file 1 [file cells-11-02844-s001.zip]

Archive with 4 entries (4 files):
- cells-1872749-supplementary Figure S3.pdf
- Supplementary fig S1.pptx
- Supplementary fig S2.pptx
- Supplementary Figure S4.pdf
